# Supplementary material for: Electrochemical hydrogenated TiO2nanotube arrays decorated with 3D cotton-like porous MnO2enables superior supercapacitive performance
Source: Royal Society of Chemistry journal article supplement (doi:10.1039/c7ra04883a), 2017-01-01
Supplement: c7ra04883a1.pdf [file c7ra04883a1.pdf]

## Supporting Information

### Electrochemical hydrogenated TiO<sub>2</sub> nanotube arrays decorated with 3D Cotton-like porous MnO<sub>2</sub> enables superior supercapacitive performance

Jiaqin Liu<sup>1,3,4\*</sup>, Juan Xu<sup>1,2</sup>, Yan Wang<sup>1,3</sup>, Jiewu Cui<sup>1,3</sup>, Hark Hoe Tan<sup>4</sup>, Yucheng Wu<sup>1,3\*</sup>

1 School of Materials Science and Engineering, Hefei University of Technology, Hefei 230009, China

2 School of Chemistry and Chemical Engineering, Hefei University of Technology, Hefei 230009, China

3 Key Laboratory of Advanced Functional Materials and Devices of Anhui Province, Hefei 230009, China

4 Department of Electronic Materials Engineering, Research School of Physics and Engineering, The Australian National University, Canberra, ACT 2601, Australia

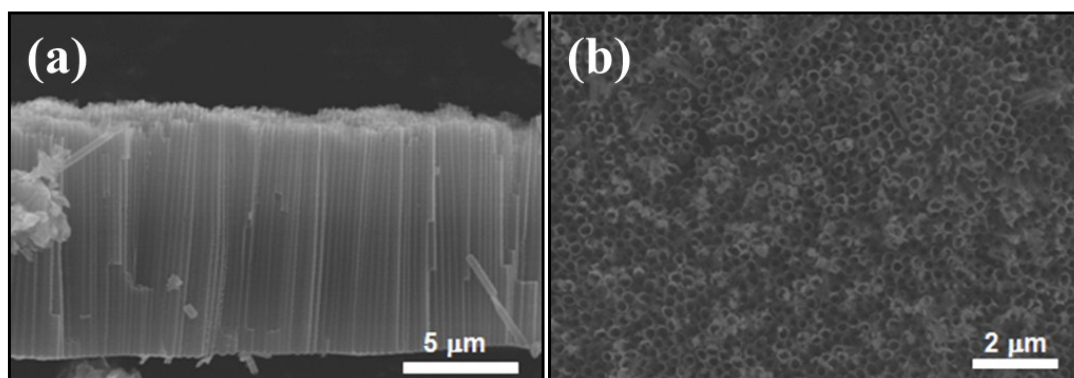

**Fig. S1** (a) Side-view FESEM images of TNTAs and (b) overall view FESEM image of MnO<sub>2</sub>/EH-TNTAs

**Table. S1** Fitting results of three different TNTAs electrodes based on the equivalent circuit

| Samples               | R <sub>s</sub> /ohm | R <sub>ct</sub> /ohm | CPE/(F·cm <sup>-2</sup> ) | Z <sub>w</sub> /ohm |
|-----------------------|---------------------|----------------------|---------------------------|---------------------|
| air-TNTAs             | 9.88                | 1475.0               | 0.00119                   | 0.00499             |
| H <sub>2</sub> -TNTAs | 7.42                | 279.20               | 0.02353                   | 0.04770             |
| EH-TNTAs              | 6.41                | 22.38                | 0.14770                   | 0.01376             |

### Capacitances calculated from CV curves:

The capacitances of electrodes were calculated from the CV curves according to the following equations:

$$C_s = \frac{S}{2 \times U \times \Delta V \times S_w}, C_m = \frac{S}{2 \times U \times \Delta V \times m}$$

where  $C_s$  ( $\text{mF}\cdot\text{cm}^{-2}$ ) refers to the areal capacitances of air-TNTAs,  $\text{H}_2$ -TNTAs and EH-TNTAs electrodes,  $S$  ( $\text{A}\cdot\text{V}$ ) is the integral area of CV curves,  $U$  ( $\text{V}\cdot\text{s}^{-1}$ ) is the scan rates,  $\Delta V$  (V) is the potential window,  $S_w$  ( $\text{cm}^2$ ) is the surface area of the air-TNTAs,  $\text{H}_2$ -TNTAs and EH-TNTAs electrodes;  $C_m$  ( $\text{F}\cdot\text{g}^{-1}$ ) refers to the specific capacitances of  $\text{MnO}_2/\text{air-TNTAs}$ ,  $\text{MnO}_2/\text{H}_2\text{-TNTAs}$  and  $\text{MnO}_2/\text{EH-TNTAs}$  electrodes, and  $m$  is the mass of  $\text{MnO}_2$ .

### Capacitances calculated from CD curves:

The capacitances of electrodes measured by galvanostatic charge/discharge method were calculated based on the following equations:

$$C_s = \frac{I \times \Delta t}{\Delta V \times S_w}, C_m = \frac{I \times \Delta t}{\Delta V \times m}$$

Where  $C_s$  ( $\text{mF}\cdot\text{cm}^{-2}$ ) refers to the areal capacitance of air-TNTAs,  $\text{H}_2$ -TNTAs and EH-TNTAs electrodes,  $I$  (A) is the constant discharging current,  $\Delta t$  is the discharging time,  $\Delta V$  (V) is the potential window, and  $S_w$  ( $\text{cm}^2$ ) is the surface area of the air-TNTAs,  $\text{H}_2$ -TNTAs and EH-TNTAs electrodes;  $C_m$  ( $\text{F}\cdot\text{g}^{-1}$ ) refers to the specific capacitance of  $\text{MnO}_2/\text{air-TNTAs}$ ,  $\text{MnO}_2/\text{H}_2\text{-TNTAs}$  and  $\text{MnO}_2/\text{EH-TNTAs}$  electrodes, and  $m$  is the mass of  $\text{MnO}_2$ .

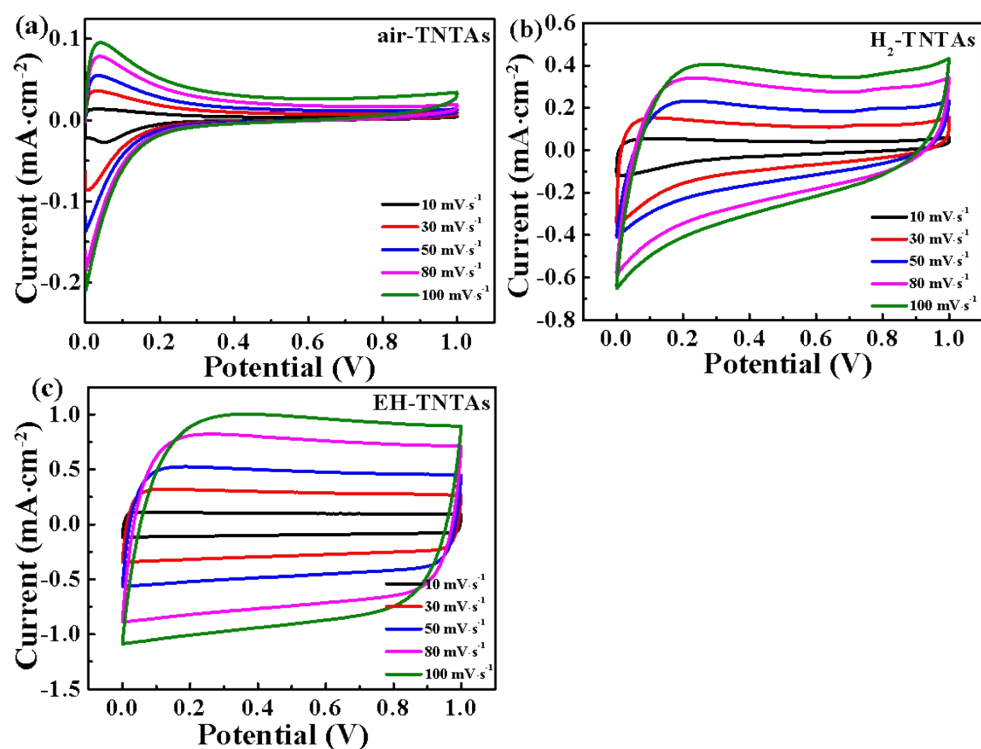

Fig. S2 CV curves of the (a) air-TNTAs, (b)  $\text{H}_2$ -TNTAs and (c) EH-TNTAs electrodes at different scan rates

**Table. S2** Areal capacitance of air-TNTAs, H<sub>2</sub>-TNTAs and EH-TNTAs at different scan rates

| scan rates (mV·s <sup>-1</sup> ) | Air-TNTAs (mF·cm <sup>-2</sup> ) | H <sub>2</sub> -TNTAs (mF·cm <sup>-2</sup> ) | EH-TNTAs (mF·cm <sup>-2</sup> ) |
|----------------------------------|----------------------------------|----------------------------------------------|---------------------------------|
| 10                               | 0.37                             | 4.11                                         | 7.76                            |
| 30                               | 0.29                             | 3.81                                         | 7.55                            |
| 50                               | 0.25                             | 3.50                                         | 7.38                            |
| 80                               | 0.20                             | 3.27                                         | 7.15                            |
| 100                              | 0.18                             | 3.14                                         | 6.96                            |

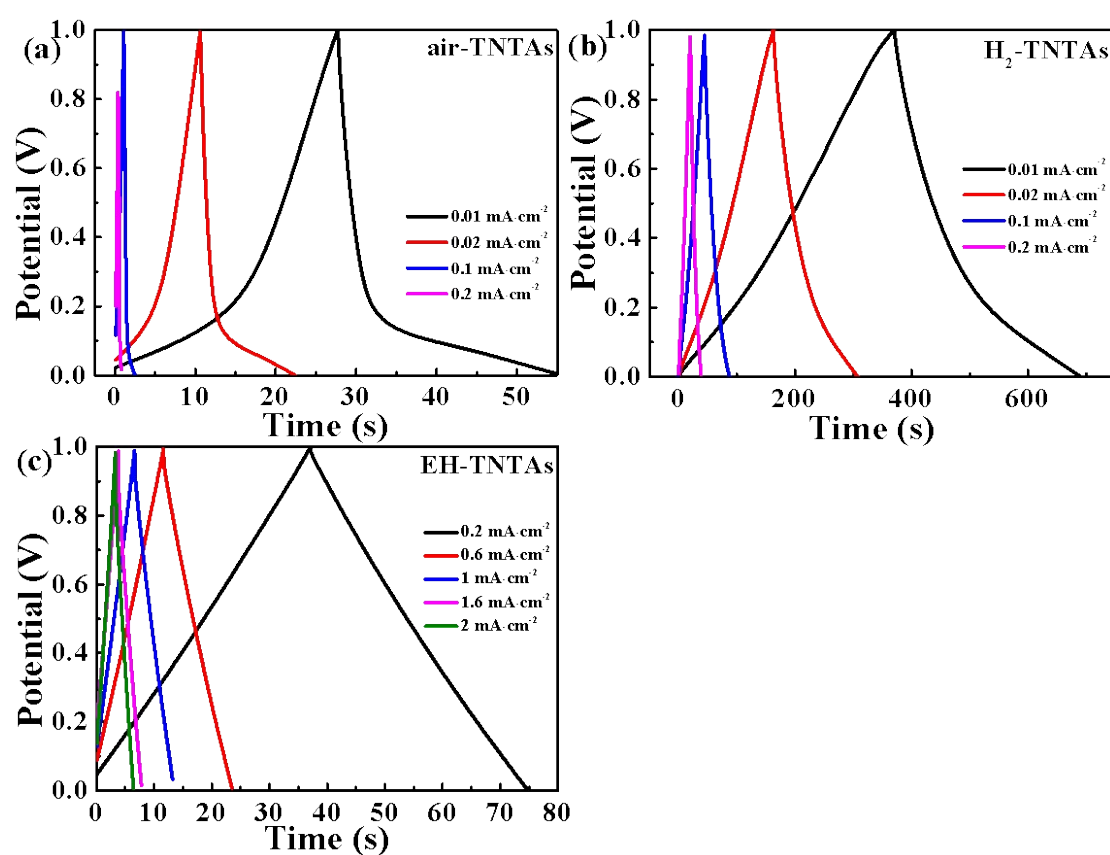

**Fig. S3** GCD curves of the (a) air-TNTAs, (b) H<sub>2</sub>-TNTAs and (c) EH-TNTAs electrodes at different current densities

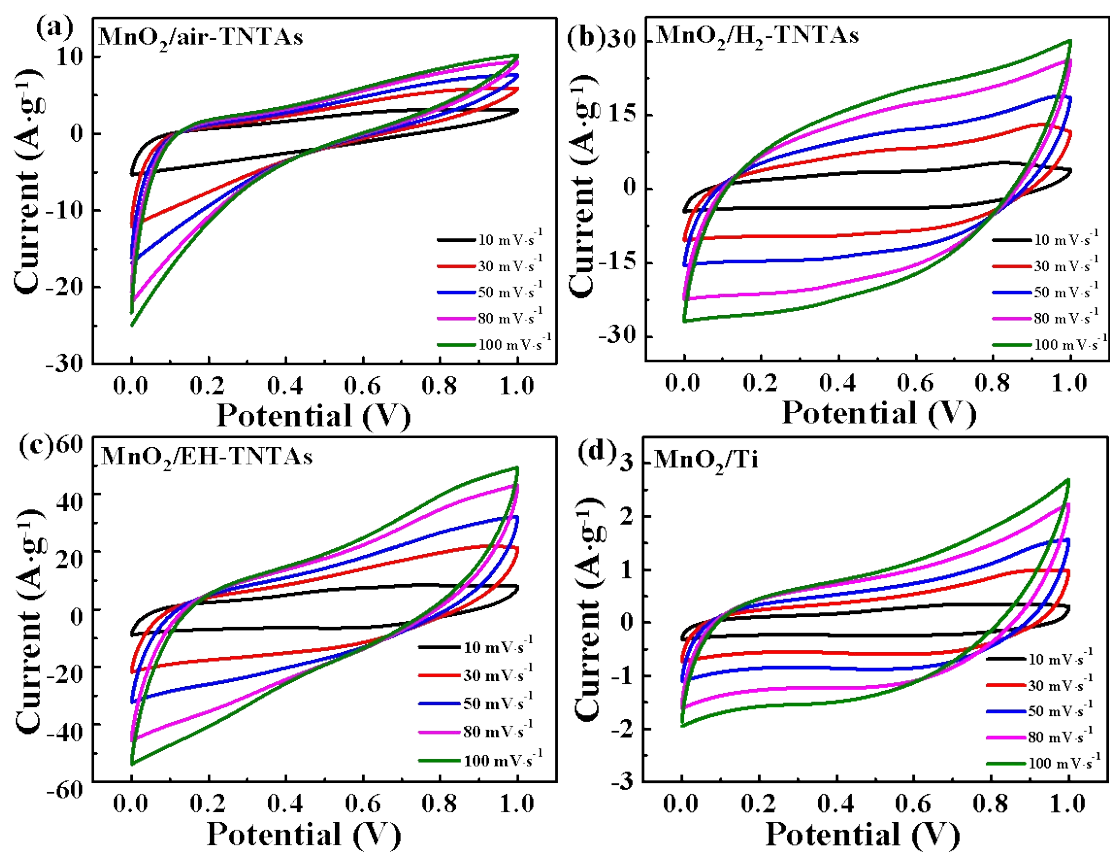

**Fig. S4** CV curves of (a)  $\text{MnO}_2/\text{air-TNTAs}$ , (b)  $\text{MnO}_2/\text{H}_2\text{-TNTAs}$ , (c)  $\text{MnO}_2/\text{EH-TNTAs}$  and (d)  $\text{MnO}_2/\text{Ti}$  electrodes at different scan rates

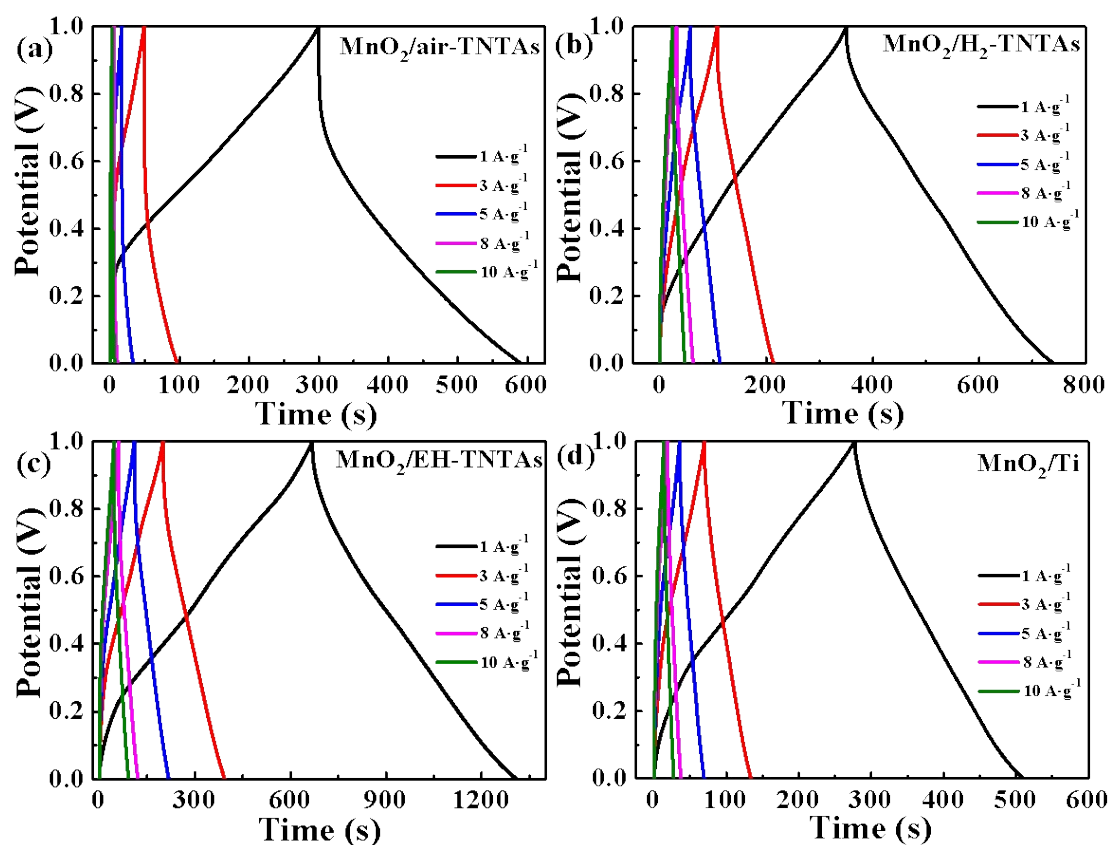

**Fig. S5** GCD curves of (a) MnO<sub>2</sub>/air-TNTAs, (b) MnO<sub>2</sub>/H<sub>2</sub>-TNTAs, (c) MnO<sub>2</sub>/EH-TNTAs and (d) MnO<sub>2</sub>/Ti electrodes at different current densities

**Table. S3** Mass of pseudo-capacitive material and the specific capacitance for MnO<sub>2</sub>-based electrode with different substrates

| Sample                                  | Mass of MnO <sub>2</sub><br>/(mg·cm <sup>-2</sup> ) | Specific capacitance<br>/(F·g <sup>-1</sup> ) at 1 A·g <sup>-1</sup> | Specific capacitance<br>/(F·g <sup>-1</sup> ) at 10 mV·s <sup>-1</sup> |
|-----------------------------------------|-----------------------------------------------------|----------------------------------------------------------------------|------------------------------------------------------------------------|
| MnO <sub>2</sub> /Ti foil               | 0.20                                                | 257.7 F·g <sup>-1</sup>                                              | 205.8 F·g <sup>-1</sup>                                                |
| MnO <sub>2</sub> /air-TNTAs             | 0.16                                                | 290.7 F·g <sup>-1</sup>                                              | 218.8 F·g <sup>-1</sup>                                                |
| MnO <sub>2</sub> /H <sub>2</sub> -TNTAs | 0.10                                                | 388.7 F·g <sup>-1</sup>                                              | 326.4 F·g <sup>-1</sup>                                                |
| MnO <sub>2</sub> /EH-TNTAs              | 0.12                                                | 650.0 F·g <sup>-1</sup>                                              | 558.9 F·g <sup>-1</sup>                                                |
| EH-TNTAs@MnO <sub>2</sub>               | 0.20                                                | 523.9 F·g <sup>-1</sup>                                              | 469.1 F·g <sup>-1</sup>                                                |

**Table. S4** Performance comparison of reported electrode materials composed of various supports and MnO<sub>2</sub> deposit

| Electrode materials                                              | Technique                                                                          | Electrolyte                           | Capacitance (F/g) | Stability (cycles) | Ref.              |
|------------------------------------------------------------------|------------------------------------------------------------------------------------|---------------------------------------|-------------------|--------------------|-------------------|
| MnO <sub>2</sub> /C@TiO <sub>2</sub>                             | C laryer coating and hydrothermal deposition of MnO <sub>2</sub>                   | 1.0 M Na <sub>2</sub> SO <sub>4</sub> | 521.4 (2 A/g)     | 88.6% (2000)       | 2016 <sup>1</sup> |
| MnO <sub>2</sub> @TNTAs                                          | Pulsed electrodeposition of MnO <sub>2</sub>                                       | 0.5 M Na <sub>2</sub> SO <sub>4</sub> | 425.0 (0.5 A/g)   | 71.4% (3000)       | 2016 <sup>2</sup> |
| MnO <sub>2</sub> /H <sub>2</sub> -TiO <sub>2</sub> /C microfiber | Hydrogen annealing and hydrothermal deposition of MnO <sub>2</sub>                 | 0.5 M Na <sub>2</sub> SO <sub>4</sub> | 630.1 (10 mV/s)   | 90.0% (5000)       | 2015 <sup>3</sup> |
| H <sub>2</sub> -TiO <sub>2</sub> NTAs/C/MnO <sub>2</sub>         | Hydrogen treatment, carbon coating and hydrothermal deposition of MnO <sub>2</sub> | 1.0 M Na <sub>2</sub> SO <sub>4</sub> | 299.8 (0.5 A/g)   | 87.0% (2000)       | 2015 <sup>4</sup> |
| MnO <sub>2</sub> -TiO <sub>2</sub> /C NTAs                       | C coating and potentiostatic deposition of MnO <sub>2</sub>                        | 0.5 M Na <sub>2</sub> SO <sub>4</sub> | 580.0 (2.6 A/g)   | 90.0% (1000)       | 2014 <sup>5</sup> |
| MnO <sub>2</sub> /C/TiO <sub>2</sub> nanowire arrays             | C coating and electrodepositing MnO <sub>2</sub>                                   | 0.5 M Na <sub>2</sub> SO <sub>4</sub> | 639.0 (1 A/g)     | 78.7% (1000)       | 2014 <sup>6</sup> |
| MnO <sub>2</sub> @TiO <sub>2</sub> nanobelt arrays               | Hydrothermal deposition of MnO <sub>2</sub>                                        | 1.0 M Na <sub>2</sub> SO <sub>4</sub> | 557.6 (200 mV/s)  | 86.3% (3000)       | 2013 <sup>7</sup> |
| H <sub>2</sub> -TiO <sub>2</sub> @MnO <sub>2</sub> nanowires     | Hydrogen annealing and anodic electrodeposition of MnO <sub>2</sub>                | 5.0 M LiCl                            | 449.6 (10 mV/s)   | 91.2% (5000)       | 2013 <sup>8</sup> |

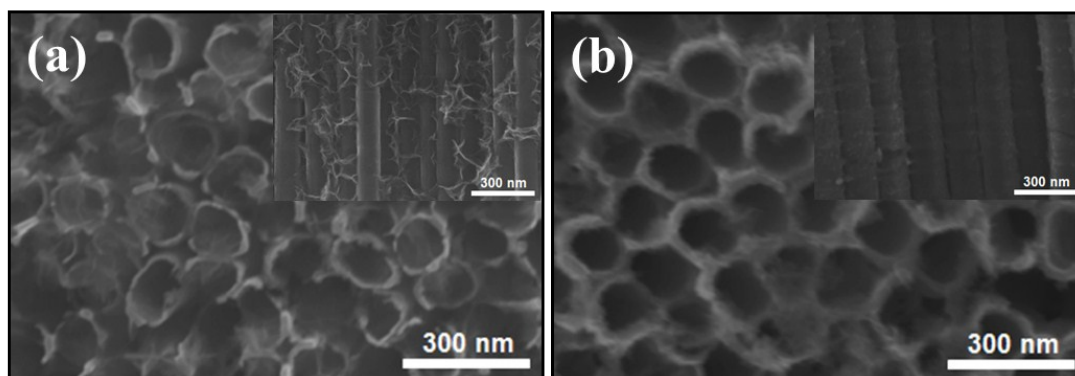

**Fig. S6** FESEM images of (a) MnO<sub>2</sub>/EH-TNTAs and (b) EH-TNTAs@MnO<sub>2</sub> (insets are the corresponding side-view images)

**Table. S5** The relative BET specific surface area of EH-TNTAs, MnO<sub>2</sub>/EH-TNTAs and EH-TNTAs@MnO<sub>2</sub>

| sample                     | Relative BET specific surface area (m <sup>2</sup> /cm <sup>2</sup> ) |
|----------------------------|-----------------------------------------------------------------------|
| EH-TNTAs                   | 0.2124                                                                |
| MnO <sub>2</sub> /EH-TNTAs | 0.3326                                                                |
| EH-TNTAs@MnO <sub>2</sub>  | 0.2677                                                                |

**Note:** Regarding to the measuring and calculation methods for the relative BET specific surface area please refer to reference [9].

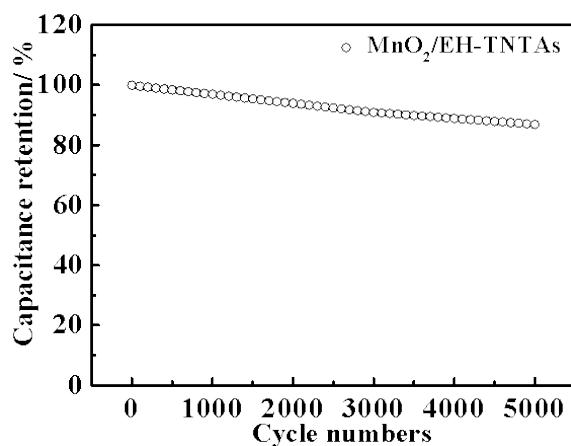

**Fig. S7** Cycling performance of the MnO<sub>2</sub>/EH-TNTAs electrode at a current density of 5 A·g<sup>-1</sup>

### References

1. Z. Wang, Y. Wang, X. Shu, C. Yu, J. Zhang, J. Cui, Y. Qin, H. Zheng, Y. Zhang and Y. Wu, *RSC Adv.*, 2016, **6**, 63642-63651.
2. H. Zhou, X. Zou and Y. Zhang, *Electrochimica Acta*, 2016, **192**, 259-267.
3. X. Y. Cao., X. Xing., N. Zhang., H. Gao., M. Y. Zhang., Y. C. Shang. and X. T. Zhang, *Journal of Materials Chemistry And Physics*, 2015, **3**, 3785-3793.
4. J. Di, X. Fu, H. Zheng and Y. Jia, *Journal of Nanoparticle Research*, 2015, **17**, 1-12.
5. B. Gao, X. Li, Y. Ma, Y. Cao, Z. Hu, X. Zhang, J. Fu, K. Huo and P. K. Chu, *Thin Solid Films*, 2014, DOI: 10.1016/j.tsf.2014.09.071.
6. SainanYang, K. Cheng, J. Huang, K. Ye, Y. Xu, D. Cao and X. Z. G. Wang, *Electrochimica Acta*, 2014, **120**, 416-422.
7. Y. Luo, D. Kong, J. Luo, S. Chen, D. Zhang, K. Qiu, X. Qi, H. Zhang, C. M. Li and T. Yu, *RSC Advances*, 2013, **3**, 14413-14422.
8. X. Lu, M. Yu, G. Wang, T. Zhai, S. Xie, Y. Ling, Y. Tong and Y. Li, *Adv Mater*, 2013, **25**, 267-272.
9. J. Liu, L. Ruan, S.B. Adeloju and Y. Wu, *Dalton Trans.*, 2014, **43**, 1706-1715.
